# Supplementary material for: Evolution and divergence of SBP-box genes in land plants
Source: PubMed Central journal article supplement (PMC4606839; doi:10.1186/s12864-015-1998-y), 2015-10-14

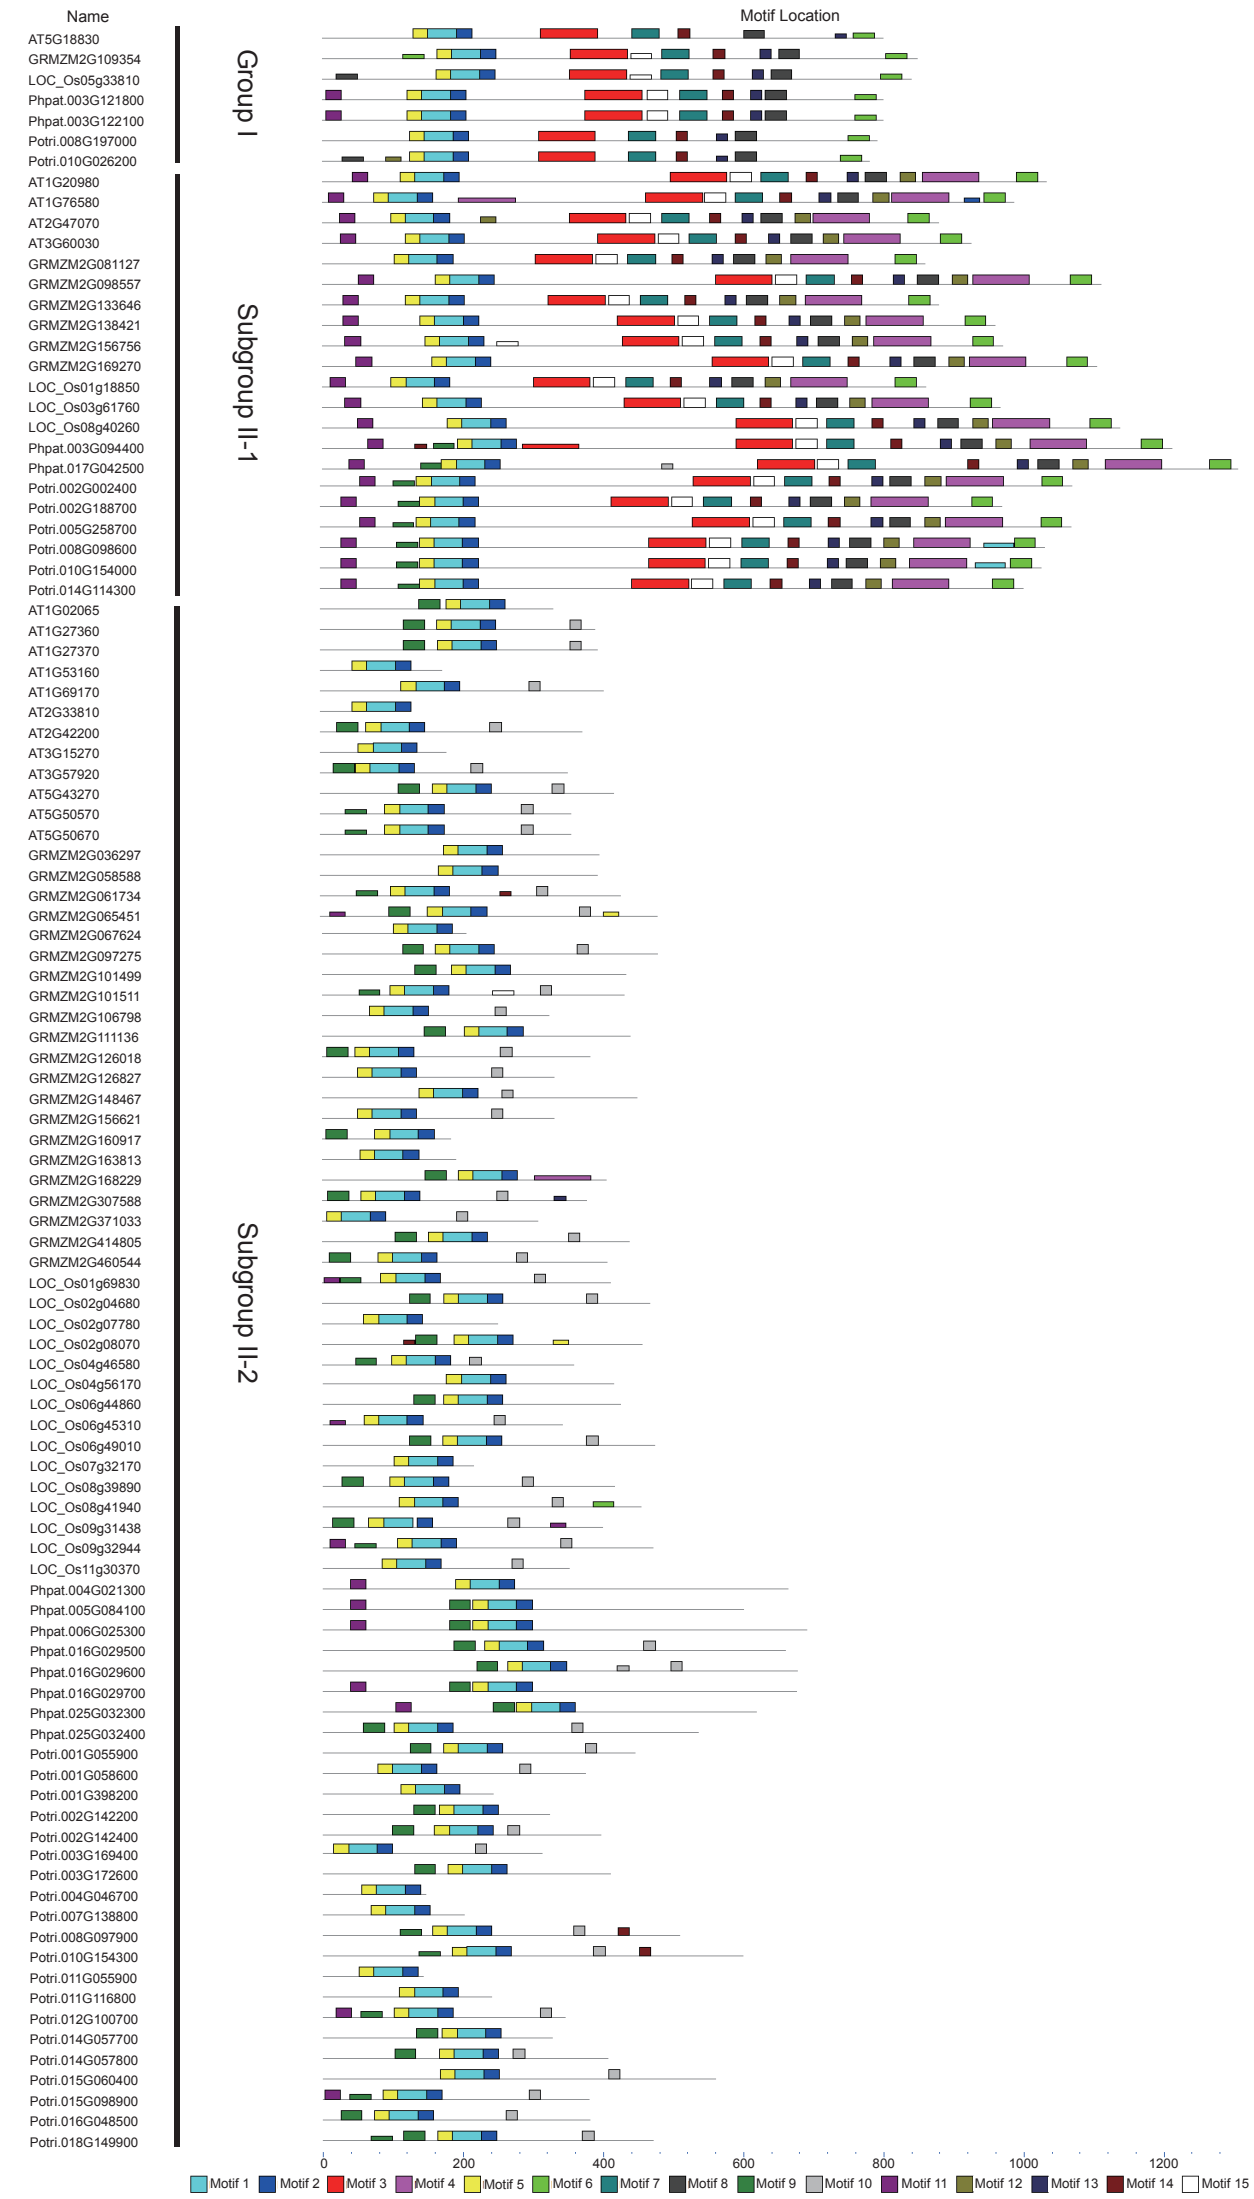

Supplement: 12864_2015_1998_MOESM1_ESM.pdf [file 12864_2015_1998_MOESM1_ESM.pdf]
